# Supplementary material
Source: PubMed Central journal article supplement (PMC3017369)
Supplement: NIHMS260054-supplement-Supplemental_Data.pdf [file NIHMS260054-supplement-Supplemental_Data.pdf]

## SUPPLEMENTAL INFORMATION:

### Mutation skew in genes identified by genome-wide association study of hypertriglyceridemia

Christopher T. Johansen<sup>1</sup>, Jian Wang<sup>1</sup>, Matthew B. Lanktree<sup>1</sup>, Henian Cao<sup>1</sup>, Adam D. McIntyre<sup>1</sup>, Matthew R. Ban<sup>1</sup>, Rebecca A. Martins<sup>1</sup>, Brooke A. Kennedy<sup>1</sup>, Reina G. Hassell<sup>1</sup>, Maartje E. Visser<sup>2</sup>, Stephen M. Schwartz<sup>3</sup>, Benjamin F. Voight<sup>4</sup>, Roberto Elosua<sup>5</sup>, Veikko Salomaa<sup>6</sup>, Christopher J. O'Donnell<sup>7,8</sup>, Geesje M. Dallinga-Thie<sup>2</sup>, Sonia S. Anand<sup>9</sup>, Salim Yusuf<sup>9</sup>, Murray W. Huff<sup>1</sup>, Sekar Kathiresan<sup>4</sup> and Robert A. Hegele<sup>1\*</sup>

<sup>1</sup>Robarts Research Institute, University of Western Ontario, London, Ontario N6A 5K8, Canada; <sup>2</sup>Departments of Experimental Vascular Medicine and Vascular Medicine, Academic Medical Center Amsterdam, Amsterdam 1105AZ, Netherlands; <sup>3</sup>Cardiovascular Health Research Unit and Departments of Medicine and Epidemiology, University of Washington, Seattle, Washington 98101, USA; <sup>4</sup>Center for Human Genetic Research, Massachusetts General Hospital, Boston 02114, and Program in Medical and Population Genetics, Broad Institute of MIT and Harvard, Cambridge 02142, Massachusetts, USA; <sup>5</sup>Cardiovascular Epidemiology and Genetics, Institut Municipal D'investigacio Medica, and CIBER Epidemiologia y Salud Pu'blica, Barcelona 08003, Spain; <sup>6</sup>Chronic Disease Epidemiology Unit, Department of Health Promotion and Chronic Disease Prevention, National Institute for Health and Welfare, Helsinki 00300, Finland; <sup>7</sup>Cardiovascular Research Center and Cardiology Division, Massachusetts General Hospital and Department of Medicine, Harvard Medical School, Boston 02114, Massachusetts, USA; <sup>8</sup>Framingham Heart Study and National, Heart, Lung, and Blood Institute, Framingham 01702, Massachusetts, USA; <sup>9</sup>Population Health Research Institute, Hamilton Health Sciences, and Departments of Medicine and Clinical Epidemiology, McMaster University, Hamilton, Ontario L8L 2X2, Canada.

\*Corresponding author (hegele@robarts.ca).

#### Corresponding Author:

Robert A. Hegele MD FRCPC FACP  
Blackburn Cardiovascular Genetics Laboratory  
Robarts Research Institute, University of Western Ontario  
London, Ontario, Canada, N6A 5K8  
Tel: 519-931-5271; Fax: 519-931-5218; E-mail: [hegele@robarts.ca](mailto:hegele@robarts.ca)

## Supplemental Methods

**Study Subjects.** This study was approved by the ethics boards at all institutions. All subjects provided informed consent for blood sampling, DNA analysis, and collection of clinical, biochemical and other demographic data. All subjects in this study were unrelated and of self-declared European ancestry. The GWAS included 463 HTG patients and 1197 low TG controls: HTG patients were predominantly obtained from a single tertiary referral lipid clinic (92% of patients) in London, Ontario, Canada, or from a tertiary referral lipid clinic in Amsterdam, Netherlands, and low TG controls were subjects with familial hypercholesterolemia (4% of controls) obtained from a single tertiary referral lipid clinic in London, Ontario, Canada, or normal healthy controls obtained from population-based studies including the Study of Health Assessment and Risk in Ethnic Groups<sup>1</sup> (18%) or the Myocardial Infarction Genetics Consortium<sup>2</sup> (78%). Subjects with familial hypercholesterolemia were included as negative controls only in the GWAS to counterbalance the increased cholesterol phenotype that is observed in patients with HTG. The resequencing cohort included 438 HTG patients and 327 low TG controls: HTG patients were obtained only from the lipid clinic in London, Ontario, Canada, and low TG controls included only normal healthy subjects from the Study of Health Assessment and Risk in Ethnic Groups.

### Sequencing and Mutation Accumulation

All subjects in the resequencing cohort were sequenced fully across the translated coding sequence of *APOA5*, *GCKR*, *LPL*, and exons 26 and 29 of *APOB* (67.8%). Subjects missing sequencing data in any one gene were removed prior to analysis. Rare variants were defined as having minor allele frequencies <1% in controls. Our intention was to identify rare missense and nonsense variants potentially

responsible for HTG disease causation, accordingly we excluded intronic variants, untranslated region variants, and synonymous variants from mutation accumulation analyses. Exclusive variants were defined as rare variants found exclusively in HTG patients or controls (not both), deliberately excluding variants previously reported without demonstrated functional compromise. Mutation accumulation analyses compared either the number of observed rare alleles versus reference alleles, or the number of rare variant carriers versus non-carriers, in HTG patients and controls. Carriers were defined as having  $\geq 1$  rare variant. Association between mutation accumulation and HTG phenotype was tested using a two-tailed Fisher's exact test, with nominal significance defined as  $P < 0.05$ .

**Explained Variation.** Subjects included in this analysis were common to both GWAS and re-sequencing cohorts. Explained variation was calculated from the residuals of a multivariate logistic regression model, using discrete case-control status as the dependent variable. Independent variables included clinical covariates age, sex, body mass index and diabetes status as either continuous or discrete variables, common variants as continuous variables of HTG risk associated alleles at each of the 7 HTG-associated loci, and rare variants as a continuous variable including the number of rare variants carried by each subject. The calculation of explained variation was generated using a published SAS v9.2 macro written for this purpose<sup>3</sup>. In logistic regression, the proportion of explained variation [as measured by the coefficient of determination ( $R^2$ ) in linear regression] does not exist in an interpretable straightforward manner. The macro used here produces a metric comparable to  $R^2$  calculated from the residuals of the logistic regression model<sup>3</sup>.

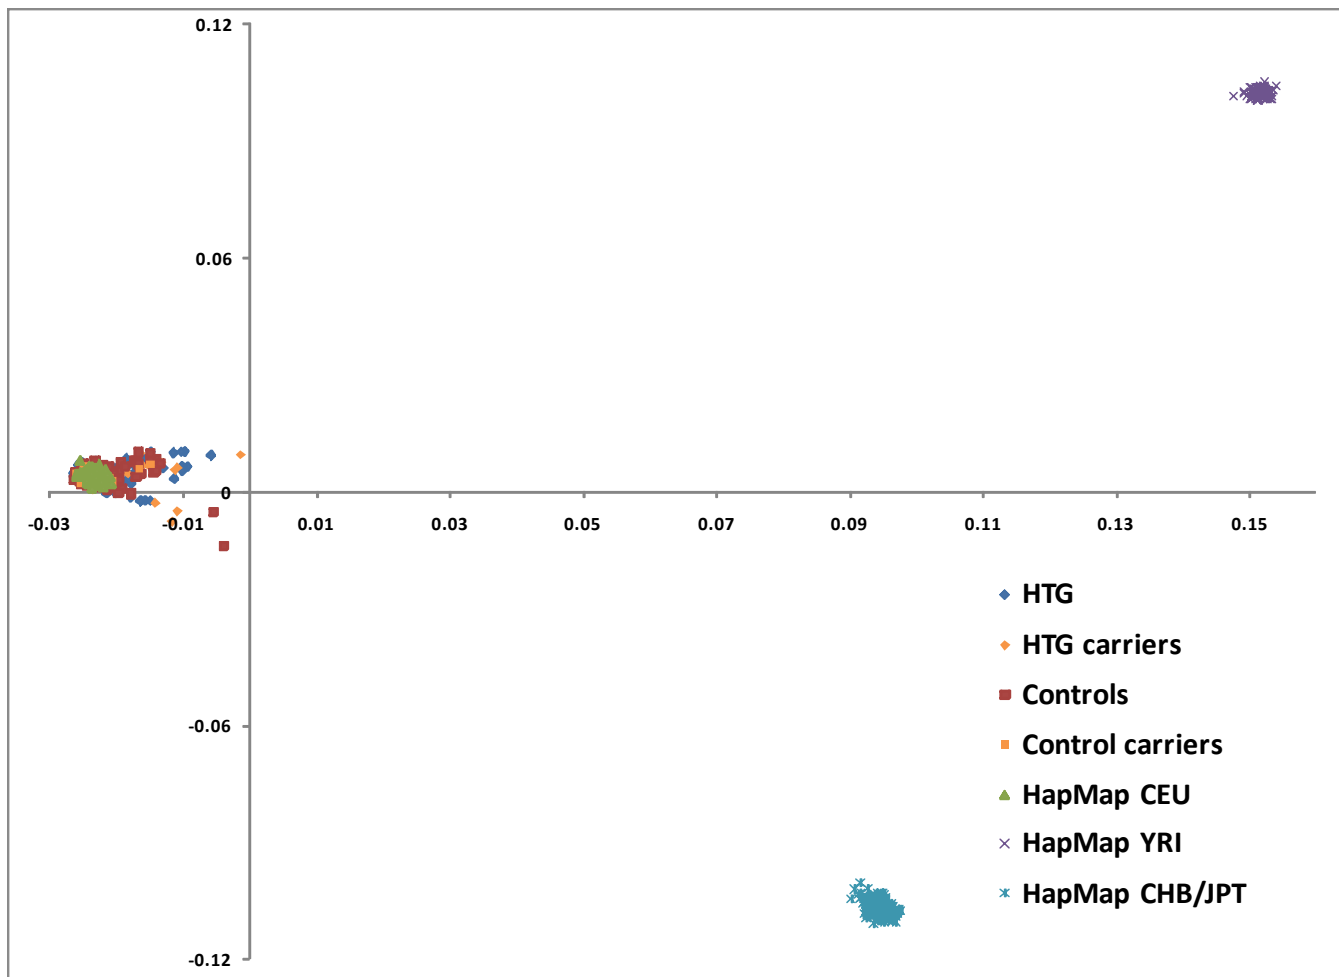

**Supplemental Figure 1. Subjects in the resequencing cohort have confirmed European ancestry.**

Identity-by-state and multidimensional scaling was performed on resequencing subjects with whole-genome SNP data to ensure they were of European ancestry, and that rare variants identified by resequencing cannot be attributed to differences in ancestry.

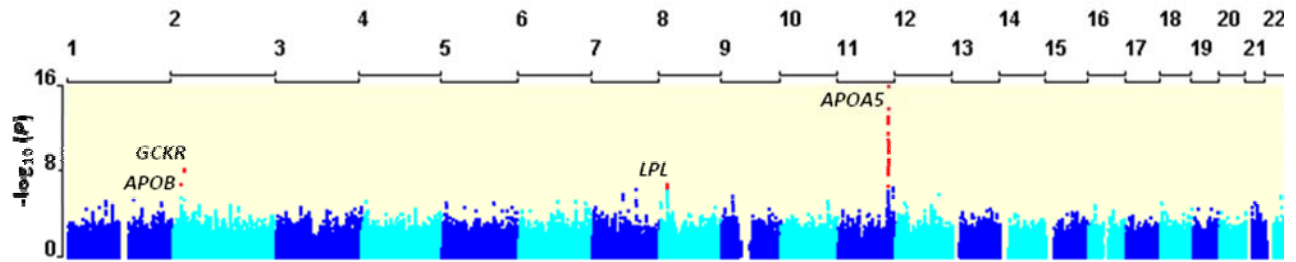

**Supplemental Figure 2. Manhattan plot of regression  $P$ -values.** SNPs were independently tested for association with HTG using multivariate logistic regression entering sex, body mass index, diabetes status and 10 principal components of ancestry as covariates. A threshold of  $P < 5 \times 10^{-7}$  was considered genome-wide significant. Red data points represent SNPs surpassing genome-wide significance, as visualized using WGAViewer<sup>4</sup>. Genome-wide associated loci are labeled. *APOA5* reached a maximum association statistic of  $5.4 \times 10^{-24}$ , however the y-axis scale is truncated for better visualization of other results.

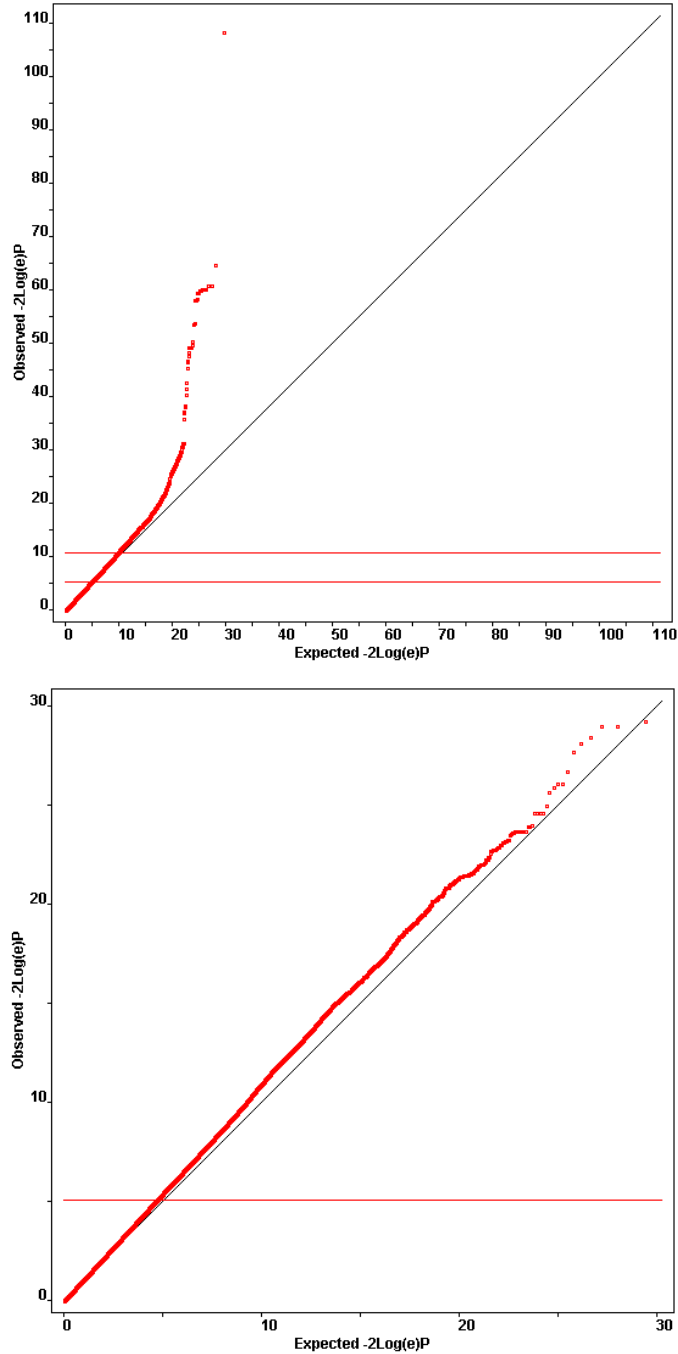

**Supplemental Figure 3. Quantile-quantile plot of regression  $P$ -values.** Deviation of  $P$ -values from the null is caused predominantly by significant associations with hypertriglyceridemia (A), which is eliminated when these loci are removed from analysis (B). Both plots show some residual inflation of association test statistics as visualized using WGAViewer<sup>4</sup>. Genomic control inflation factor was calculated as  $\lambda = 1.07$  in PLINK<sup>5</sup>.

**Supplemental Table 1. Annotation of rare variants found in GWAS-identified genes.**

|              | Mutation       | New/Known | HTG | Controls | Damaging?* | Published Dysfunction                                         |
|--------------|----------------|-----------|-----|----------|------------|---------------------------------------------------------------|
| <i>APOA5</i> |                |           |     |          |            |                                                               |
|              | p.N66S         | New       | 1   | 0        | Possibly   | Reduced LPL activation by ~23% <sup>6</sup>                   |
|              | p.G185C        | Known     | 1   | 0        | Possibly   |                                                               |
|              | p.Q305X        | New       | 1   | 0        | Truncation |                                                               |
|              | p.A315V        | Known     | 1   | 1        | Benign     |                                                               |
|              | p.D332Vfs336X  | New       | 1   | 0        | Truncation |                                                               |
| <i>GCKR</i>  |                |           |     |          |            |                                                               |
|              | p.Q8_H9insRF   | New       | 1   | 0        | Insertion  |                                                               |
|              | p.L37Q         | New       | 1   | 0        | Benign     |                                                               |
|              | p.R51G         | New       | 1   | 0        | Possibly   |                                                               |
|              | p.R51Q         | New       | 1   | 1        | Benign     |                                                               |
|              | p.G65_Q66fs88X | New       | 1   | 0        | Truncation |                                                               |
|              | p.E77G         | New       | 1   | 0        | Possibly   |                                                               |
|              | p.Q234P        | New       | 6   | 3        | Possibly   |                                                               |
|              | p.M344I        | New       | 1   | 0        | Benign     |                                                               |
|              | p.T379Nfs414X  | New       | 4   | 1        | Truncation |                                                               |
|              | p.D414E        | New       | 1   | 0        | Possibly   |                                                               |
|              | p.H438Y        | New       | 1   | 0        | Possibly   |                                                               |
|              | p.R540X        | New       | 1   | 0        | Truncation |                                                               |
| <i>LPL</i>   |                |           |     |          |            |                                                               |
|              | p.Q-12Efs11X   | Known     | 1   | 0        | Truncation |                                                               |
|              | p.E11G         | New       | 1   | 1        | Probably   |                                                               |
|              | p.D25H         | Known     | 1   | 0        | Probably   |                                                               |
|              | p.W86R         | Known     | 1   | 0        | Probably   | Causative of chylomicronemia, LPL activity <3% <sup>7</sup>   |
|              | p.T186A        | New       | 0   | 1        | Probably   |                                                               |
|              | p.G188E        | Known     | 10  | 0        | Possibly   | Causative of chylomicronemia, LPL activity < 1% <sup>8</sup>  |
|              | p.I194T        | Known     | 1   | 0        | Probably   | Causative of chylomicronemia, LPL activity < 1% <sup>9</sup>  |
|              | p.P207L        | Known     | 1   | 0        | Probably   | Causative of chylomicronemia, LPL activity < 1% <sup>10</sup> |
|              | p.R243C        | Known     | 1   | 0        | Probably   |                                                               |
|              | p.R243H        | Known     | 1   | 0        | Probably   | Abolished enzyme activity <sup>11</sup>                       |
|              | p.I249V        | New       | 0   | 1        | Benign     |                                                               |
|              | p.C275F        | New       | 1   | 0        | Probably   |                                                               |
|              | p.N291S        | Known     | 24  | 5        | Benign     | LPL activity ~60% <sup>12</sup>                               |
|              | p.V318I        | New       | 1   | 0        | Benign     |                                                               |
| <i>APOB</i>  |                |           |     |          |            |                                                               |
|              | p.Y1385H       | New       | 1   | 0        | Possibly   |                                                               |
|              | p.C1395Y       | Known     | 1   | 1        | Benign     |                                                               |
|              | p.G1590E       | New       | 1   | 1        | Probably   |                                                               |
|              | p.R1662H       | Known     | 2   | 0        | Benign     |                                                               |

|                 |       |   |   |            |                                                                    |
|-----------------|-------|---|---|------------|--------------------------------------------------------------------|
| p.K1703T        | New   | 0 | 1 | Possibly   |                                                                    |
| p.D1827N        | New   | 0 | 1 | Possibly   |                                                                    |
| p.V2019I        | Known | 0 | 1 | Possibly   |                                                                    |
| p.A2172T        | New   | 1 | 0 | Benign     |                                                                    |
| p. del2186D     | New   | 3 | 4 | Deletion   |                                                                    |
| p.R2192C        | New   | 1 | 0 | Probably   |                                                                    |
| p.S2217N        | New   | 1 | 0 | Benign     |                                                                    |
| p.L2239M        | New   | 1 | 0 | Benign     |                                                                    |
| p.V2286I        | Known | 2 | 1 | Benign     |                                                                    |
| p.M2331I        | New   | 1 | 0 | Possibly   |                                                                    |
| p.S2402T        | Known | 1 | 0 | Benign     |                                                                    |
| p.A2429D        | Known | 1 | 0 | Benign     |                                                                    |
| p.V2512I        | Known | 2 | 3 | Benign     |                                                                    |
| p.E2539K        | Known | 5 | 0 | Benign     |                                                                    |
| p.E2539D        | New   | 1 | 0 | Benign     |                                                                    |
| p.R2685C        | New   | 0 | 1 | Possibly   |                                                                    |
| p.P2794L        | Known | 6 | 2 | Probably   |                                                                    |
| p.I2850Y        | New   | 1 | 0 | Possibly   |                                                                    |
| p.K2958E        | New   | 1 | 0 | Benign     |                                                                    |
| p.T3020R        | Known | 1 | 0 | Benign     |                                                                    |
| p.P3216S        | New   | 1 | 0 | Benign     |                                                                    |
| p.S3252G        | Known | 4 | 0 | Possibly   |                                                                    |
| p.M3253V        | New   | 1 | 1 | Possibly   |                                                                    |
| p.S3267P        | Known | 3 | 0 | Possibly   |                                                                    |
| p.Q3405E        | Known | 5 | 3 | Benign     |                                                                    |
| p.Y3435C        | Known | 1 | 0 | Probably   |                                                                    |
| p.D3472N        | New   | 1 | 0 | Benign     |                                                                    |
| p.R3500W        | Known | 1 | 0 | Probably   | Causative of familial defective apolipoprotein B-100 <sup>13</sup> |
| p.T3540M        | New   | 0 | 1 | Benign     |                                                                    |
| p.V3718I        | New   | 1 | 1 | Benign     |                                                                    |
| p.I3741T        | New   | 1 | 0 | Possibly   |                                                                    |
| p.D3768N        | New   | 0 | 1 | Possibly   |                                                                    |
| p.S3774T        | New   | 3 | 3 | Benign     |                                                                    |
| p. T3799M       | Known | 1 | 1 | Possibly   |                                                                    |
| p.V3804F        | New   | 0 | 1 | Benign     |                                                                    |
| p.V4101M        | Known | 3 | 3 | Benign     |                                                                    |
| p.S4206T        | Known | 1 | 0 | Benign     |                                                                    |
| p.V4238A        | New   | 8 | 3 | Benign     |                                                                    |
| p.I4287V        | Known | 6 | 4 | Benign     |                                                                    |
| p.M4293V        | New   | 1 | 0 | Benign     |                                                                    |
| p.V4367A        | Known | 1 | 0 | Benign     |                                                                    |
| p.S4403T        | Known | 1 | 0 | Benign     |                                                                    |
| p.I4455V        | New   | 0 | 1 | Benign     |                                                                    |
| p.T4457M        | Known | 6 | 0 | Possibly   |                                                                    |
| p.F4486Ifs4488X | New   | 1 | 0 | Truncation |                                                                    |

\*Polyphen (<http://genetics.bwh.harvard.edu/pph/>) was used only to predict the deleterious nature of non-synonymous variants, other mutation types are indicated.



## Supplemental References

1. Anand, S.S. et al. Differences in risk factors, atherosclerosis, and cardiovascular disease between ethnic groups in Canada: the Study of Health Assessment and Risk in Ethnic groups (SHARE). *Lancet* **356**, 279-84 (2000).
2. Kathiresan, S. et al. Genome-wide association of early-onset myocardial infarction with single nucleotide polymorphisms and copy number variants. *Nat Genet* **41**, 334-41 (2009).
3. Mittlbock, M. & Schemper, M. Computing measures of explained variation for logistic regression models. *Comput Methods Programs Biomed* **58**, 17-24 (1999).
4. Ge, D. et al. WGAViewer: software for genomic annotation of whole genome association studies. *Genome Res* **18**, 640-3 (2008).
5. Purcell, S. et al. PLINK: a tool set for whole-genome association and population-based linkage analyses. *Am J Hum Genet* **81**, 559-75 (2007).
6. Dorfmeister, B. et al. Effects of six APOA5 variants, identified in patients with severe hypertriglyceridemia, on in vitro lipoprotein lipase activity and receptor binding. *Arterioscler Thromb Vasc Biol* **28**, 1866-71 (2008).
7. Ishimura-Oka, K. et al. A missense mutation (Trp86----Arg) in exon 3 of the lipoprotein lipase gene: a cause of familial chylomicronemia. *Am J Hum Genet* **50**, 1275-80 (1992).
8. Emi, M. et al. Missense mutation (Gly----Glu188) of human lipoprotein lipase imparting functional deficiency. *J Biol Chem* **265**, 5910-6 (1990).
9. Henderson, H.E. et al. Amino acid substitution (Ile194----Thr) in exon 5 of the lipoprotein lipase gene causes lipoprotein lipase deficiency in three unrelated probands. Support for a multicentric origin. *J Clin Invest* **87**, 2005-11 (1991).
10. Ma, Y. et al. A mutation in the human lipoprotein lipase gene as the most common cause of familial chylomicronemia in French Canadians. *N Engl J Med* **324**, 1761-6 (1991).
11. Gotoda, T. et al. Heterogeneous mutations in the human lipoprotein lipase gene in patients with familial lipoprotein lipase deficiency. *J Clin Invest* **88**, 1856-64 (1991).
12. Busca, R. et al. The mutant Asn291-->Ser human lipoprotein lipase is associated with reduced catalytic activity and does not influence binding to heparin. *FEBS Lett* **367**, 257-62 (1995).
13. Gaffney, D. et al. Independent mutations at codon 3500 of the apolipoprotein B gene are associated with hyperlipidemia. *Arterioscler Thromb Vasc Biol* **15**, 1025-9 (1995).
